# Supplementary material for: A promising ternary sulfide bidirectional p–n heterojunction for unassisted tandem photoelectrochemical cells
Source: Royal Society of Chemistry journal article supplement (doi:10.1039/d1cc01240a), 2021-01-01
Supplement: d1cc01240a1.pdf [file d1cc01240a1.pdf]

## Supplemental Information

### Reagents and chemicals

In the experiments, the related reagents are analytical reagents and can be used without further purification, which are described as follows: acetone ( $\text{CH}_3\text{COCH}_3$ , Tianjin, FengChuan, 99.7%), isopropanol ( $(\text{CH}_3)_2\text{CHOH}$ , Tianjin, FengChuan, 99.7%), absolute ethanol ( $\text{CH}_3\text{CH}_2\text{OH}$ , Tianjin, FengChuan, 99.7%), zinc chloride hexahydrate ( $\text{ZnCl}_2 \cdot 6\text{H}_2\text{O}$ , Tianjin, GuangFu, 99%), cupric chloride dihydrate ( $\text{CuCl}_2 \cdot 2\text{H}_2\text{O}$ , Tianjin, GuangFu, 99%), indium chloride tetrahydrate ( $\text{InCl}_3 \cdot 4\text{H}_2\text{O}$ , Tianjin, GuangFu, 99%), Thioacetamide ( $\text{CH}_3\text{CSNH}_2$ , Tianjin, GuangFu, 99%), absolute ethanol ( $\text{C}_2\text{H}_6\text{O}$ , Tianjin, GuangFu, 99.8%) sodium sulfate ( $\text{Na}_2\text{SO}_4$ , Tianjin, GuangFu, 99%). The specifications of fluorine-doped tin oxide (FTO) glass are described as follows: The manufacturer is South China Science and Technology Ltd. The production size and experimental size are  $10\text{ cm} \times 10\text{ cm} \times 0.22\text{ cm}$  and  $1\text{ cm} \times 1\text{ cm} \times 0.22\text{ cm}$ , respectively. The square resistance is less than  $7\ \Omega$ . The film thickness is 500 nm. The transmittance is more than 80%.

### Preparation of n-type $\text{ZnIn}_2\text{S}_4$ and p-type $\text{CuInS}_2$

The n-type  $\text{ZnIn}_2\text{S}_4$  nanosheets were prepared on fluorine-doped tin oxide (FTO) substrate through hydrothermal method, and the precursor solution is composed of 0.01 M Zinc chloride ( $\text{ZnCl}_2$ ), 0.02 M Indium chloride tetrahydrate ( $\text{InCl}_3 \cdot 4\text{H}_2\text{O}$ ) and 0.08 M Thioacetamide ( $\text{CH}_3\text{CSNH}_2$ ). Subsequently, the solution was poured into the prepared Teflon-lined stainless steel and heated at  $160\text{ }^\circ\text{C}$  for 12 h. The p-type  $\text{CuInS}_2$  nanosheets were fabricated via alcohothermal method, 0.04 M  $\text{CuCl}_2 \cdot 2\text{H}_2\text{O}$ , 0.08 M  $\text{InCl}_3 \cdot 4\text{H}_2\text{O}$  and 0.08 M  $\text{CH}_3\text{CSNH}_2$  were dissolved in 12 mL absolute ethanol, stirring for 30 min to obtain precursor solution, which was poured into the Teflon lined stainless steel autoclave with FTO for 16 h at  $180\text{ }^\circ\text{C}$ .

### Preparation of $\text{ZnIn}_2\text{S}_4/\text{CuInS}_2$ and $\text{CuInS}_2/\text{ZnIn}_2\text{S}_4$ photoelectrodes

Typically, the obtained  $\text{ZnIn}_2\text{S}_4/\text{FTO}$  substrate is placed in a Teflon lined stainless steel autoclave and the  $\text{ZnIn}_2\text{S}_4/\text{CuInS}_2$  heterojunction is prepared by the alcohothermal method as with the preparation of pure  $\text{CuInS}_2$ . Similarly, the as-obtained  $\text{CuInS}_2/\text{FTO}$  substrate is placed in a Teflon lined stainless steel autoclave with the conductive surface facing down at an angle of  $45^\circ$ , and the  $\text{CuInS}_2/\text{ZnIn}_2\text{S}_4$  heterojunction was prepared by the hydrothermal method as with the preparation of pure  $\text{ZnIn}_2\text{S}_4$ .

### Characterization

The crystalline structures of samples were characterized by the data from X-ray diffractometer (XRD, Rigaku-D/max-2500; Cu  $\text{K}\alpha$  radiation;  $\lambda = 0.154059\text{ nm}$ ; working

voltage with 40 kV and working current with 150 mA). The morphology and microstructure of samples were carried out on Scanning electron microscopy (SEM, JEOL JSM-7800F) and JEOL JEM-2100 transmission electron microscopy (TEM). Incidentally, energy dispersive spectro-meter (EDS, AZtec from Oxford) element mapping was conducted to analyze the chemical composition and stoichiometry of obtained samples. The optical absorption performance of samples was examined via a DU-8B UV-Vis double-beam spectrophotometer (UV-visible absorption spectrometer). A series of PEC performances of the as-prepared samples were probed using a three-electrode device with the prepared films as working electrode, a platinum electrode as counter electrode and Ag/AgCl (saturated KCl) as reference electrode in 0.2 M Na<sub>2</sub>SO<sub>4</sub> (pH=6.8) aqueous solution via an electrochemical workstation and irradiated with a Xenon lamp (AM 1.5 G, 100 mW·cm<sup>-2</sup>). The collected Ag/AgCl potential values were converted to the reversible hydrogen electrode (RHE) potential via using the equation:  $E_{RHE} = E_{Ag/AgCl} + 0.059pH + 0.1976 \text{ V}$ . A 300 W Xenon lamp was used to generate simulated sun light irradiation (AM 1.5 G, 100 mW/cm<sup>2</sup>). The electrochemical impedance spectra (EIS) measurements were collected on a three-electrode configuration with AC amplitude of 5 mV and frequency range of 10-100 kHz. Moreover, the surface photovoltage (SPV) measurements can characterization of the separation of photoinduced charge in photoelectrodes through the surface photovoltage spectrometer (PL-SPS/IPCE1000) indirectly. More importantly, the band energy level of ZnIn<sub>2</sub>S<sub>4</sub> and CuInS<sub>2</sub> can be calculated via Ultraviolet photoelectron spectroscopy (UPS). the calculation was according to the following equations:

$$VBM = h\nu - (E_{cutoff} - E_{onset})$$

Where VBM is valence band maximum,  $h\nu$  (nonmonochromatized He-I $\alpha$  radiation,  $h\nu = 21.22 \text{ eV}$ ), the  $E_{cutoff}$  and  $E_{onset}$  is the secondary electron cut-off and binding energy onset, respectively.

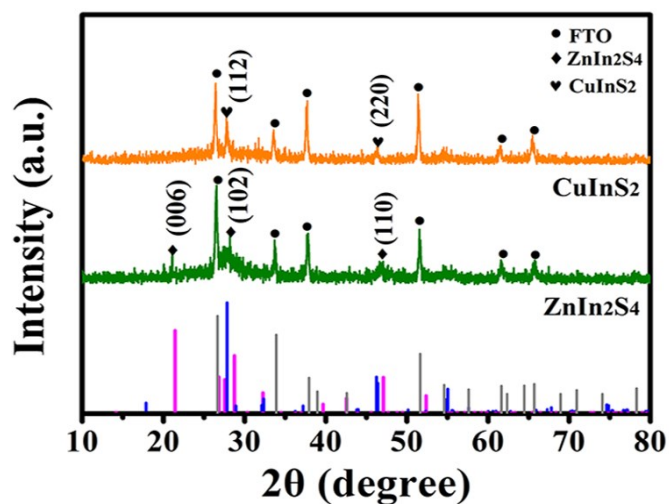

Fig. S1 XRD pattern of ZnIn<sub>2</sub>S<sub>4</sub> and CuInS<sub>2</sub>. The bottom peaks are standard position of ZnIn<sub>2</sub>S<sub>4</sub> (JCPDS 72-0773, pink solid), CuInS<sub>2</sub> (JCPDS 82-1702, blue solid) and SnO<sub>2</sub> (JCPDS 77-0452, black solid)

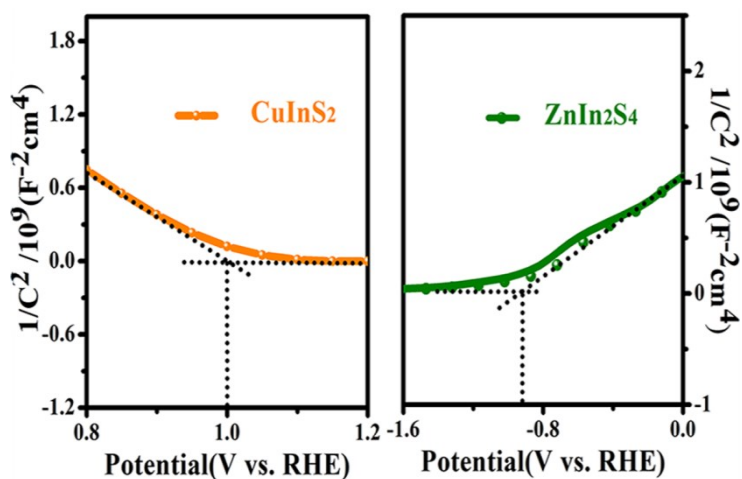

Fig. S2 Mott-Schottky plots of ZnIn<sub>2</sub>S<sub>4</sub> and CuInS<sub>2</sub>

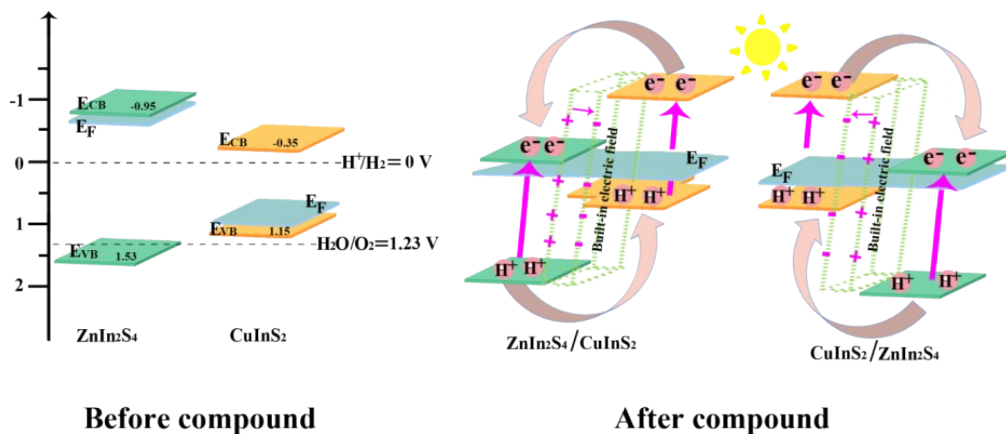

Fig. S3 Schematic diagram of  $\text{ZnIn}_2\text{S}_4$  and  $\text{CuInS}_2$  before and after forming bidirectional p-n heterojunction ( $\text{ZnIn}_2\text{S}_4/\text{CuInS}_2$  p-n heterojunction and  $\text{CuInS}_2/\text{ZnIn}_2\text{S}_4$  p-n heterojunction)

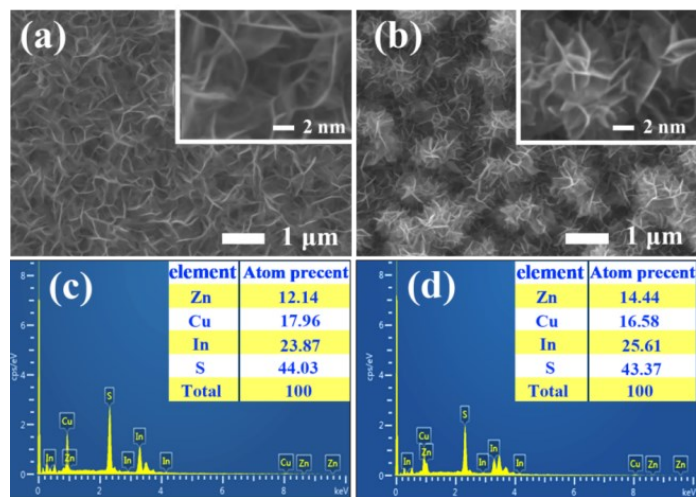

Fig. S4 The SEM images of (a)  $\text{ZnIn}_2\text{S}_4/\text{CuInS}_2$  p-n heterojunction and (b)  $\text{CuInS}_2/\text{ZnIn}_2\text{S}_4$  p-n heterojunction, the EDS spectrum of (c)  $\text{ZnIn}_2\text{S}_4/\text{CuInS}_2$  p-n heterojunction and (d)  $\text{CuInS}_2/\text{ZnIn}_2\text{S}_4$  p-n heterojunction

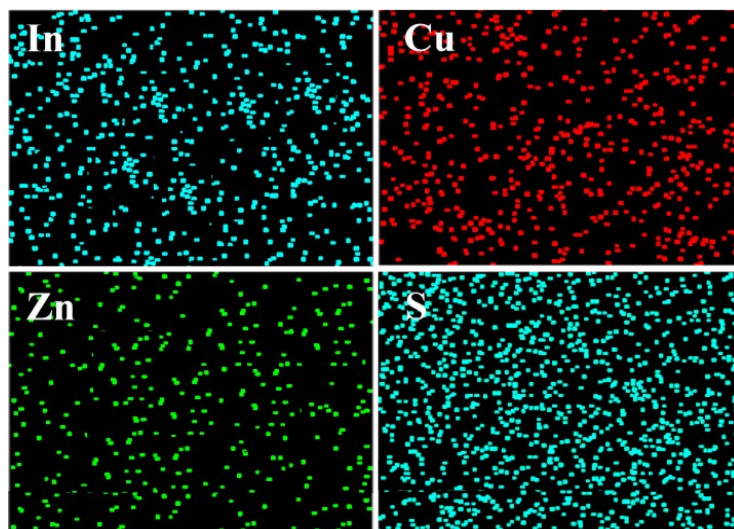

Fig. S5 Element distribution mapping

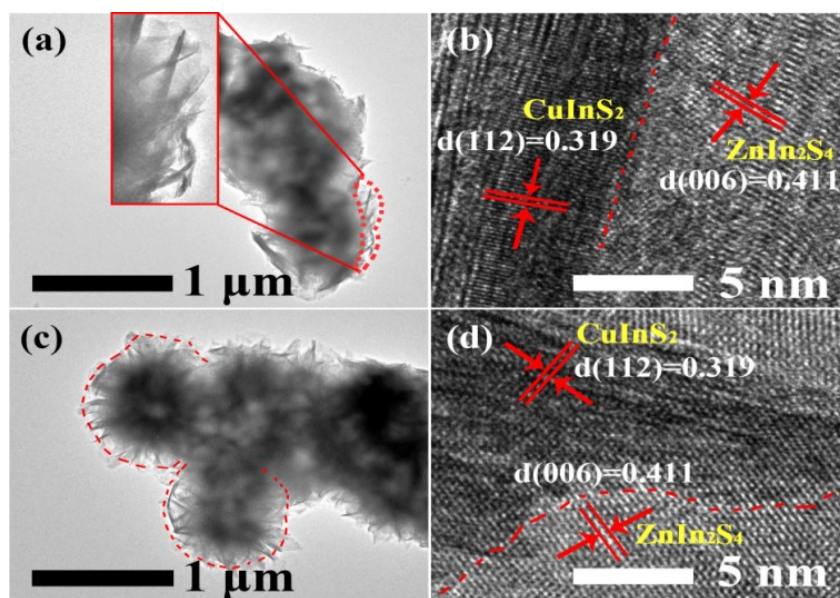

Fig. S6 TEM image (a) and HRTEM image (b) of ZnIn<sub>2</sub>S<sub>4</sub>/CuInS<sub>2</sub> p-n heterojunction, TEM image (c) and HRTEM image (d) of CuInS<sub>2</sub>/ZnIn<sub>2</sub>S<sub>4</sub> p-n heterojunction

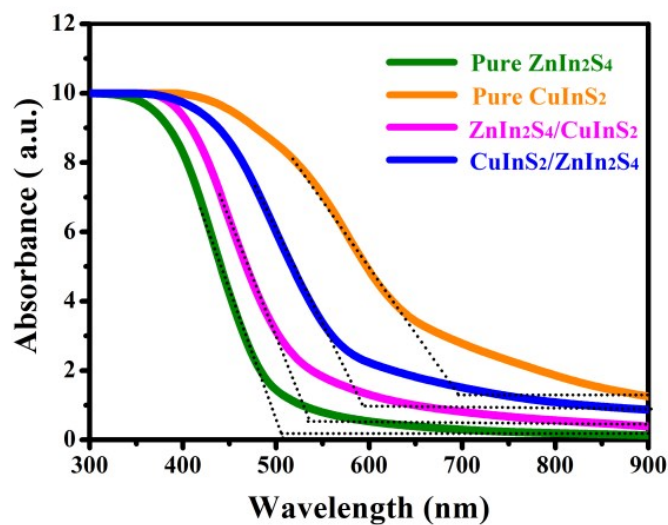

Fig. S7 UV-vis spectra of ZnIn<sub>2</sub>S<sub>4</sub>, CuInS<sub>2</sub>, ZnIn<sub>2</sub>S<sub>4</sub>/CuInS<sub>2</sub> p-n heterojunction and CuInS<sub>2</sub>/ZnIn<sub>2</sub>S<sub>4</sub> p-n heterojunction

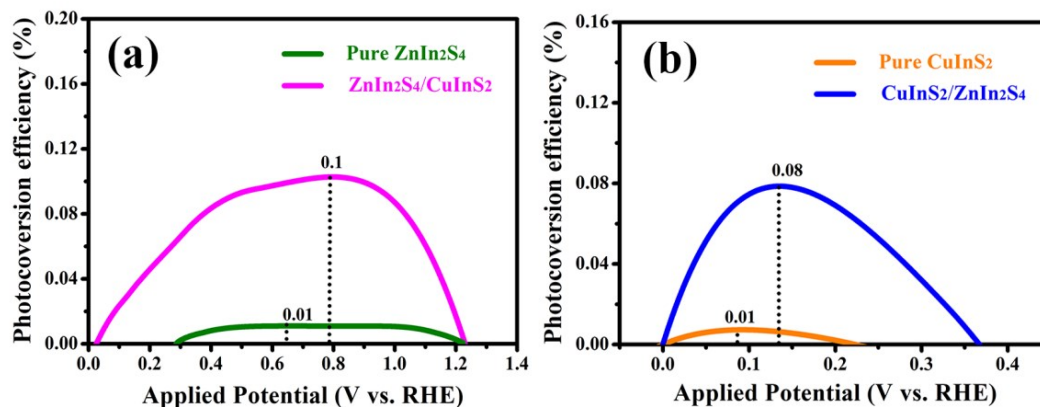

Fig. S8 Calculated applied bias photon-to-current efficiency (ABPE) curves of ZnIn<sub>2</sub>S<sub>4</sub>, CuInS<sub>2</sub>, ZnIn<sub>2</sub>S<sub>4</sub>/CuInS<sub>2</sub> p-n heterojunction and CuInS<sub>2</sub>/ZnIn<sub>2</sub>S<sub>4</sub> p-n heterojunction

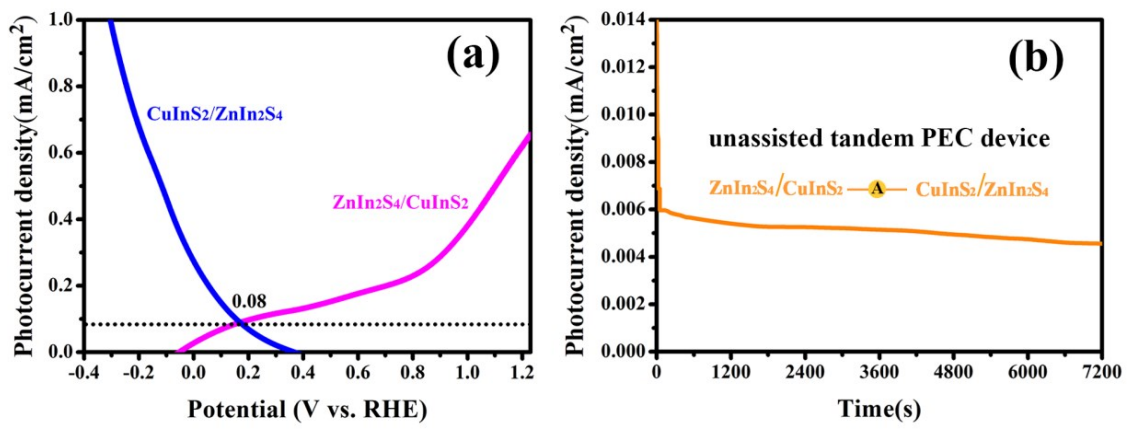

Fig. S9 (a) I–V curves of bidirectional p-n heterojunction photoelectrodes (ZnIn<sub>2</sub>S<sub>4</sub>/CuInS<sub>2</sub> photoanode and CuInS<sub>2</sub>/ZnIn<sub>2</sub>S<sub>4</sub> photocathode); (b) the I-T curve measured in unassisted tandem PEC cell device
